# Supplementary material for: A multimodal analysis of physical activity, sleep, and work shift in nurses with wearable sensor data
Source: PubMed Central journal article supplement (PMC8062546; doi:10.1038/s41598-021-87029-w), 2021-04-22
Supplement: 41598_2021_87029_MOESM1_ESM.pdf [file 41598_2021_87029_MOESM1_ESM.pdf]

# A multimodal analysis of physical activity, sleep, and work shift in nurses with wearable sensor data (Supplementary)

Tiantian Feng, Brandon M. Booth, Brooke Baldwin-Rodríguez, Felipe Osorno, Shrikanth Narayanan

Table 1: Results of the three-way ANOVA tests on the rest-activity ratio. Statistical significance is denoted with \*\*  $p < 0.01$ , \*  $p < 0.05$ .

|               | Rest-Activity Ratio |         |              |         |
|---------------|---------------------|---------|--------------|---------|
|               | Workday             |         | Off-day      |         |
|               | F statistics        | p-value | F statistics | p-value |
| <b>Age</b>    | 3.73                | 0.056   | 5.06         | 0.027*  |
| <b>Gender</b> | 0.05                | 0.826   | 0.02         | 0.903   |
| <b>Shift</b>  | 9.77                | 0.002** | 7.36         | 0.008** |
| <b>DOF</b>    | 101                 |         | 91           |         |

Table 2: Results of the three-way ANOVA tests on the walk activity. Statistical significance is denoted with \*\*  $p < 0.01$ , \*  $p < 0.05$ .

|               | Walk-Activity Ratio |         |              |         |
|---------------|---------------------|---------|--------------|---------|
|               | Workday             |         | Off-day      |         |
|               | F statistics        | p-value | F statistics | p-value |
| <b>Age</b>    | 3.34                | 0.071   | 0.16         | 0.689   |
| <b>Gender</b> | 8.71                | 0.004** | 7.50         | 0.007** |
| <b>Shift</b>  | 4.93                | 0.028*  | 5.16         | 0.025*  |
| <b>DOF</b>    | 101                 |         | 91           |         |

Table 3: Results of the three-way ANOVA tests on the vigorous activity. Statistical significance is denoted with \*\*  $p < 0.01$ , \*  $p < 0.05$ .

|               | Vigorous-Activity Duration |         |              |         |
|---------------|----------------------------|---------|--------------|---------|
|               | Workday                    |         | Off-day      |         |
|               | F statistics               | p-value | F statistics | p-value |
| <b>Age</b>    | 11.54                      | 0.001** | 9.76         | 0.002** |
| <b>Gender</b> | 1.53                       | 0.219   | 0.46         | 0.498   |
| <b>Shift</b>  | 2.02                       | 0.159   | 4.50         | 0.037*  |
| <b>DOF</b>    | 101                        |         | 91           |         |

Table 4: Results of the three-way ANOVA tests on the sleep duration. Statistical significance is denoted with  $** p < 0.01$ ,  $* p < 0.05$ .

|               | Sleep Duration |         |              |         |
|---------------|----------------|---------|--------------|---------|
|               | Workday        |         | Off-day      |         |
|               | F statistics   | p-value | F statistics | p-value |
| <b>Age</b>    | 0.67           | 0.415   | 7.45         | 0.008** |
| <b>Gender</b> | 4.79           | 0.031*  | 1.39         | 0.241   |
| <b>Shift</b>  | 65.55          | <0.01** | 2.65         | 0.107   |
| <b>DOF</b>    | 90             |         | 90           |         |

Table 5: Results of the three-way ANOVA tests on the sleep efficiency. Statistical significance is denoted with  $** p < 0.01$ ,  $* p < 0.05$ .

|               | Sleep Efficiency |         |              |         |
|---------------|------------------|---------|--------------|---------|
|               | Workday          |         | Off-day      |         |
|               | F statistics     | p-value | F statistics | p-value |
| <b>Age</b>    | 0.14             | 0.715   | 0.15         | 0.703   |
| <b>Gender</b> | 0.07             | 0.796   | 0.20         | 0.656   |
| <b>Shift</b>  | 2.68             | 0.105   | 3.10         | 0.082   |
| <b>DOF</b>    | 90               |         | 90           |         |

Table 6: Results of the three-way ANOVA tests on the sleep efficiency. Statistical significance is denoted with  $** p < 0.01$ ,  $* p < 0.05$ .

|               | Social Jet Lag (MS) |         |
|---------------|---------------------|---------|
|               | F statistics        | p-value |
|               | <b>Age</b>          | 0.01    |
| <b>Gender</b> | 0.55                | 0.462   |
| <b>Shift</b>  | 274.11              | <0.01** |
| <b>DOF</b>    | 85                  |         |

Table 7: Results from the linear regression models to predict self-report variables using the rest activity ratio on workdays. Statistical significance is denoted with  $** p < 0.01$ ,  $* p < 0.05$ .

|                                                | <b>SWLS</b>  | <b>STAI</b>  | <b>PSQI</b>  | <b>PA</b>    | <b>NA</b>    |
|------------------------------------------------|--------------|--------------|--------------|--------------|--------------|
|                                                | std. $\beta$ | std. $\beta$ | std. $\beta$ | std. $\beta$ | std. $\beta$ |
| Intercept                                      | -0.54*       | 0.15         | 0.27         | 0.40         | 0.57*        |
| Age [< 40 Years]                               | 0.28         | -0.15        | -0.30        | 0.24         | -0.24        |
| Gender [Female]                                | 0.37         | -0.05        | 0.23         | -0.36        | -0.43*       |
| Shift [Day shift]                              | 0.38         | -0.16        | -0.53*       | -0.27        | -0.29        |
| Rest Activity Ratio(Workday)                   | -0.11        | 0.35         | 0.06         | -0.51*       | 0.03         |
| Shift [Day shift]×Rest-activity Ratio(Workday) | 0.36         | -0.25        | -0.02        | 0.48         | 0.01         |
| Number of Observations                         | 104          | 105          | 104          | 105          | 105          |
| Adjust $R^2$                                   | 0.083*       | 0.019        | 0.076*       | 0.047        | 0.032        |

Table 8: Results from the linear regression models to predict self-report variables using the walk-activity ratio on workdays. Statistical significance is denoted with  $**p < 0.01$ ,  $*p < 0.05$ .

|                                                         | <b>SWLS</b><br>std $\beta$ | <b>STAI</b><br>std. $\beta$ | <b>PSQI</b><br>std. $\beta$ | <b>PA</b><br>std. $\beta$ | <b>NA</b><br>std. $\beta$ |
|---------------------------------------------------------|----------------------------|-----------------------------|-----------------------------|---------------------------|---------------------------|
| Intercept                                               | -0.54 *                    | 0.31                        | 0.33                        | 0.08                      | 0.62**                    |
| Age [ $< 40$ Years]                                     | 0.22                       | -0.29                       | -0.39                       | 0.45*                     | -0.26                     |
| Gender [Female]                                         | 0.37                       | -0.16                       | 0.12                        | -0.13                     | -0.44                     |
| Shift [Day shift]                                       | 0.35                       | -0.18                       | -0.47 *                     | -0.24                     | -0.32                     |
| Walk Activity Ratio(Workday)                            | 0.12                       | -0.34                       | -0.20                       | 0.28                      | 0.11                      |
| Shift [Day shift] $\times$ Walk-activity Ratio(Workday) | -0.21                      | 0.22                        | 0.03                        | 0.06                      | -0.18                     |
| Number of Observations                                  | 104                        | 105                         | 104                         | 105                       | 105                       |
| Adjust $R^2$                                            | 0.043                      | 0.032                       | 0.102**                     | 0.101**                   | 0.038                     |

Table 9: Results from the linear regression models to predict self-report variables using the sleep duration on workdays. Statistical significance is denoted with  $**p < 0.01$ ,  $*p < 0.05$ .

|                                                     | <b>SWLS</b><br>std $\beta$ | <b>STAI</b><br>std. $\beta$ | <b>PSQI</b><br>std. $\beta$ | <b>PA</b><br>std. $\beta$ | <b>NA</b><br>std. $\beta$ |
|-----------------------------------------------------|----------------------------|-----------------------------|-----------------------------|---------------------------|---------------------------|
| Intercept                                           | -0.75 *                    | 0.72*                       | 0.66*                       | -0.26                     | 0.72*                     |
| Age [ $< 40$ Years]                                 | 0.25                       | -0.31                       | -0.42 *                     | 0.42*                     | -0.24                     |
| Gender [Female]                                     | 0.31                       | -0.10                       | 0.27                        | -0.26                     | -0.51 *                   |
| Shift [Day shift]                                   | 0.65*                      | -0.75 **                    | -0.94 **                    | 0.33                      | -0.37                     |
| Sleep Duration(Workday)                             | -0.15                      | 0.48*                       | 0.32                        | -0.47 *                   | 0.13                      |
| Shift [Day shift] $\times$ Sleep Duration (Workday) | 0.08                       | -0.24                       | -0.41                       | 0.31                      | -0.05                     |
| Number of Observations                              | 94                         | 94                          | 93                          | 94                        | 94                        |
| Adjust $R^2$                                        | 0.061                      | 0.078*                      | 0.191**                     | 0.095*                    | 0.027                     |

Table 10: Results from the linear regression models to predict self-report variables using the sleep efficiency on workdays. Statistical significance is denoted with  $**p < 0.01$ ,  $*p < 0.05$ .

|                                                      | <b>SWLS</b><br>std $\beta$ | <b>STAI</b><br>std. $\beta$ | <b>PSQI</b><br>std. $\beta$ | <b>PA</b><br>std. $\beta$ | <b>NA</b><br>std. $\beta$ |
|------------------------------------------------------|----------------------------|-----------------------------|-----------------------------|---------------------------|---------------------------|
| Intercept                                            | -0.62 *                    | 0.23                        | 0.53*                       | 0.17                      | 0.62*                     |
| Age [ $< 40$ Years]                                  | 0.26                       | -0.34                       | -0.40 *                     | 0.43*                     | -0.25                     |
| Gender [Female]                                      | 0.27                       | -0.01                       | 0.33                        | -0.36                     | -0.47                     |
| Shift [Day shift]                                    | 0.52*                      | -0.21                       | -0.93 **                    | -0.10                     | -0.26                     |
| Sleep Efficiency(Workday)                            | 0.08                       | 0.27                        | -0.85 *                     | 0.02                      | -0.12                     |
| Shift [Day shift] $\times$ Sleep Efficiency(Workday) | -0.08                      | -0.39                       | 0.77                        | 0.00                      | 0.09                      |
| Number of Observations                               | 94                         | 94                          | 93                          | 94                        | 94                        |
| Adjust $R^2$                                         | 0.053                      | 0.012                       | 0.207**                     | 0.026                     | 0.022                     |

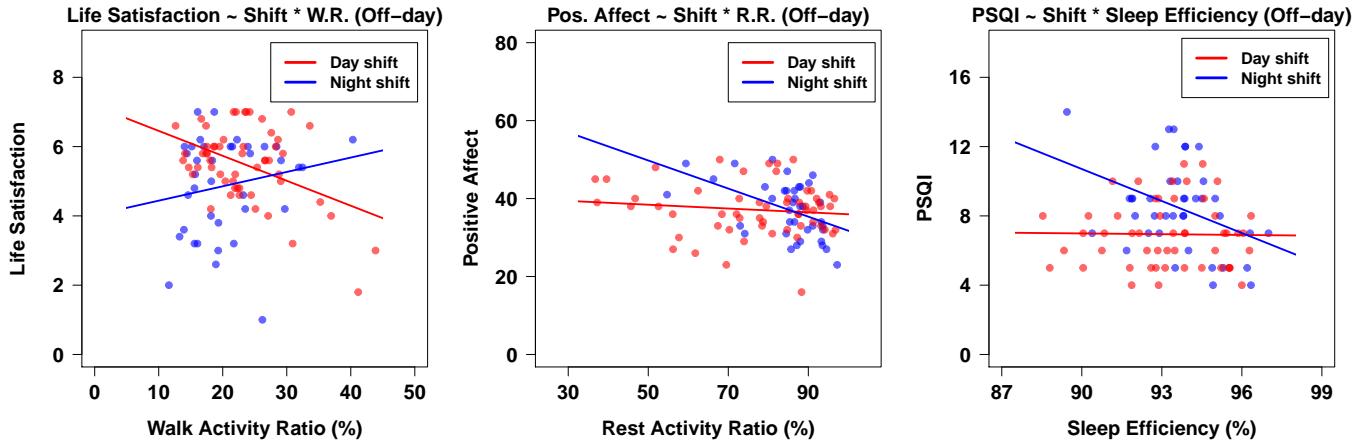

Figure 1: Interaction plot between self-report behavioral variables and sensor data in different shift schedules. R.R represents the rest activity ratio, and W.R is the walk activity ratio.
